2. Dimick JB, Ghaferi AA, Osborne NH, Ko CY, Hall BL: Reliability adjustment for reporting hospital outcomes with surgery. *Ann Surg* 2012; 255:703–7
3. Cohen ME, Ko CY, Bilimoria KY, Zhou L, Huffman K, Wang X, Liu Y, Kraemer K, Meng X, Merkow R, Chow W, Matel B, Richards K, Hart AJ, Dimick JB, Hall BL: Optimizing ACS NSQIP modeling for evaluation of surgical quality and risk: Patient risk adjustment, procedure mix adjustment, shrinkage adjustment, and surgical focus. *J Am Coll Surg* 2013; 217:336–46.e1
4. Salkowski N, Snyder JJ, Zaun DA, Leighton T, Edwards EB, Israni AK, Kasiske BL: A scientific registry of transplant recipients Bayesian method for identifying underperforming transplant programs. *Am J Transplant* 2014; 14: 1310–7
5. Lawson EH, Ko CY, Adams JL, Chow WB, Hall BL: Reliability of evaluating hospital quality by colorectal surgical site infection type. *Ann Surg* 2013; 258:994–1000
6. Jha AK, Zaslavsky AM: Quality reporting that addresses disparities in health care. *JAMA* 2014; 312:225–6
7. Fiscella K, Burstin HR, Nerenz DR: Quality measures and sociodemographic risk factors: To adjust or not to adjust. *JAMA* 2014; 312:2615–6

## ANESTHESIOLOGY REFLECTIONS FROM THE WOOD LIBRARY-MUSEUM

### *The Mesmerist* by Arthur Seldon

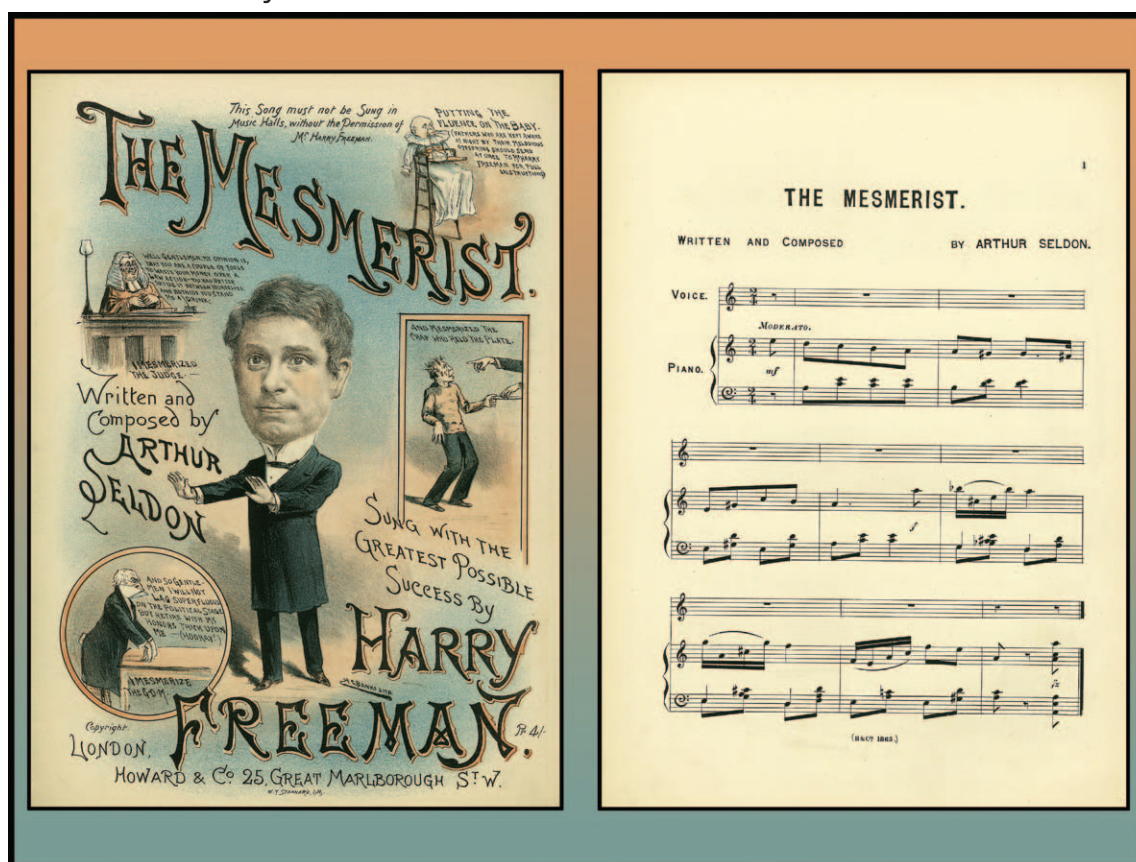

Whether called “animal magnetists,” hypnotists, or mesmerists, many entertainers introduced the public to the concept of preventing surgical pain well before Morton’s 1846 public demonstration of surgical etherization. And after that demonstration, some mesmerists offered hypnotic anesthesia as an alternative to the perceived perils of chemical anesthetics. “Sung with the greatest possible success” in the 1890s by London music hall performer Harry Freeman, “The Mesmerist” was a song “written and composed” by Arthur Seldon (right). This colorfully covered song sheet (left) was collected by the late Maurice Rickards, the founder of the Ephemera Society of Great Britain. Considered a throw-away item by some, such a piece of ephemera was regarded by Rickards as a “fragment of social history, a reflection of the spirit of its time.” In 2015, Drs. Ben Z. Swanson and George Bause donated this item to the Wood Library-Museum in memory of Swanson’s mentor, Maurice Rickards, whose not-so-ephemeral legacy included his masterwork “bible” for collectors of ephemera: *The Encyclopedia of Ephemera: A Guide to the Fragmentary Documents of Everyday Life for the Collector, Curator, and Historian*. (Copyright © the American Society of Anesthesiologists, Inc.)

George S. Bause, M.D., M.P.H., Honorary Curator, ASA’s Wood Library-Museum of Anesthesiology, Schaumburg, Illinois, and Clinical Associate Professor, Case Western Reserve University, Cleveland, Ohio. UJYC@aol.com.
